# Supplementary material for: Macrocyclic ligand design. A synthetic, solvent extraction, computational and NMR study of the effect of cryptand flexibility on sodium ion affinity†
Source: Royal Society of Chemistry journal article supplement (doi:10.1039/b102585f), 2001-01-01
Supplement: b102585f.doc [file b102585f.doc]

**SUPPLEMENTARY DATA**

**Macrocyclic ligand design. A synthetic, solvent extraction, computational and NMR study of the effect of cryptand flexibility on sodium ion affinity**

**Kenneth R. Adam,*a* Ian M. Atkinson,*a* Jeong Kim,***b,c*  **Leonard F. Lindoy,**b* Owen A. Matthews,*a* George V. Meehan,*a* Fiona Raciti,***a* **Brian W. Skelton,*d* Niels Svenstrup***a* **and Allan H. White*d***

*a School of Biomedical and Molecular Science, James Cook University, Townsville, Qld. 4811, Australia*

*b Centre for Heavy Metals Research, School of Chemistry, The University of Sydney, F11, N.S.W. 2006, Australia*

*c Department of Chemistry, Seonam University, Namwon, 590-711, Korea*

***d*** *Department of Chemistry, The University of Western Australia, Nedlands, W.A. 6009, Australia*

**Table 1S** 1H- and 13C-NMR chemical () and induced ()*a* in ppm for the interaction of **1** (2.2.2) with alkali metal ions in dimethylformamide-d7 at 25o C

| Resonance |  |  | *a* | | | | |
| --- | --- | --- | --- | --- | --- | --- | --- |
| **1** | **1 +** Li+ | **1** + Na+ | **1** + K+ | **1** + Rb+ | **1** + Cs+ |
| N***CH***2CH2O | (1H) | 2.59 | 0.00 | +0.08 | -0.01 | -0.03 | 0.00 |
|  | (13C) | 56.99 | -0.12 | -3.79 | -2.52 | -2.16 | -0.57 |
| NCH2***CH***2O | (1H) | 3.55 | +0.01 | +0.07 | +0.03 | +0.01 | 0.00 |
|  | (13C) | 70.49 | -0.09 | -2.48 | -2.35 | -2.23 | -0.56 |
| O***CH***2CH2O | (1H) | 3.62 | 0.00 | +0.04 | 0.00 | -0.01 | 0.00 |
|  | (13C) | 71.27 | -0.12 | -2.37 | -0.38 | -0.16 | -0.21 |
| *a* Induced chemical shift relative to free **1**. | | | | | | | |

**Table 2S** 1H- and 13C-NMR chemical () and induced ()*a* in ppm for the interaction of **2** (R = *t-*Bu) and its Li+, Na+ and K+ metal complexes in dimethylformamide-d7 at 25o C

| Resonance |  |  | *a* induced shifts | | |
| --- | --- | --- | --- | --- | --- |
| **2** (R = *t-*Bu)  chemical shift  (ppm) | **2** (R = *t-*Bu) + Li+  induced shift | **2** (R = *t-*Bu) + Na+  induced shift | **2** (R= *t-*Bu) + K+  induced shift |
| N***CH***2CH2O | (1H) | 2.94 | 0.00 | -0.34 | -0.25 |
|  | (13C) | 52.46 | +0.03 | +3.91 | +2.67 |
| NCH2***CH***2O | (1H) | 3.45 | -0.01 | -0.27 | -0.22 |
|  | (13C) | 55.29 | -0.13 | +1.08 | +3.72 |
| O***CH***2CH2O | (1H) | 3.53 | 0.00 | +0.01 | -0.07 |
|  | (13C) | 67.87 | +0.03 | -0.68 | +0.87 |
| Ar***CH***2N | (1H) | 3.90 | 0.00 | +0.51 | -0.29 |
|  | (13C) | 70.97 | -0.08 | -1.05 | -0.61 |
| ArO***CH***2 | (1H) | 4.38 | +0.01 | +0.13 | +0.18 |
|  | (13C) | 70.97 | -0.14 | -1.69 | -1.25 |
| CH-6*b* | (1H) | 6.99 | +0.01 | +0.22 | +0.17 |
|  | (13C) | 111.20 | +0.06 | +2.72 | +1.76 |
| CH-5*b* | (1H) | 7.24 | +0.01 | +0.15 | +0.16 |
|  | (13C) | 124.62 | +0.02 | +1.55 | +1.76 |
| CH-3*b* | (1H) | 7.51 | -0.01 | -0.09 | -0.09 |
|  | (13C) | 127.77 | +0.01 | +2.41 | +3.11 |
| *a* Induced chemical shift relative to free **2** (R = *t*-Bu). *b* Aromatic ring; numbering of aromatic C and, where present, H atoms, begins at **1** (C attached to O), **2** (C attached to benzyl- methylene carbon) etc in sequence around the ring. | | | | | |

**Table 3S**  1H- and 13C-NMR chemical () and induced ()*a* in ppm for the interaction of **4** (R = *t*-Bu) and its Li+ and Na+ metal complexes in dimethylformamide-d7 at 25o C

| Resonance |  |  | *a* induced shifts | |
| --- | --- | --- | --- | --- |
| **4** (R = *t-*Bu)  chemical shift  (ppm) | **4** (R = *t-*Bu) + Li+  induced shift | **4** (R = *t-*Bu) + Na+  induced shift |
| Ar***CH***2N | (1H) | 4.00 | -0.01 | -0.01 |
|  | (13C) | 53.49 | -0.52 | -0.49 |
| ArO***CH***2 | (1H) | 4.23 | 0.00 | 0.00 |
|  | (13C) | 66.72 | -0.52 | -0.47 |
| CH-6*b* | (1H) | 6.85 | -0.01 | 0.00 |
|  | (13C) | 111.00 | -0.51 | -0.47 |
| CH-5*b* | (1H) | 7.18 | 0.00 | 0.00 |
|  | (13C) | 123.96 | -0.52 | -0.49 |
| CH-3*b* | (1H) | 7.99 | +0.02 | *c* |
|  | (13C) | 124.46 | -0.53 | -0.50 |
| *a* Change in chemical shift relative to free **4** (R = *t-*Bu). *b* Aromatic ring; numbering of aromatic C and, where present, H atoms, begins at 1 (C attached to O), 2 (C attached to benzyl methylene carbon) etc. in sequence around the ring. *c* Corresponding peak not identified. | | | | |
